# Supplementary material
Source: publisher figshare collection journal article supplement (https://acs.figshare.com/ndownloader/files/4043539)
Supplement: Supplementary file 1 [file 4043539]

## Supporting Information for:

### The effects of conformational alteration induced by D-/L-Isonucleoside incorporation in siRNA on their stability in serum and silencing activity.

#Ye Huang<sup>1</sup>, #Zhuo Chen<sup>1</sup>, #Yue Chen<sup>1</sup>, Hao Zhang<sup>1</sup>, Yichao Zhang<sup>2</sup>, Yilei Zhao<sup>2</sup>, Zhenjun Yang<sup>1,\*</sup>, Lihe Zhang<sup>1,\*</sup>

**1** State Key Laboratory of Natural and Biomimetic Drugs, School of Pharmaceutical Sciences, Peking University, Beijing 100191, China, **2** State Key Laboratory of Microbial Metabolism, School of Life Sciences and Biotechnology, Shanghai Jiao Tong University, Shanghai, China

#### Contents

Circular dichroism spectra of D-/L-IsoNA modified siRNAs

Predicted regional molecular structures of D-/L-isoNA modified siRNA

Sfold calculated internal stability profile

#### Figure

Figure S1

Figure S2

Figure S3

---

#These authors contributed equally to this paper.

\*To whom correspondence should be addressed. Tel: 86-10-82802503; Email: [zdszlh@bjmu.edu.cn](mailto:zdszlh@bjmu.edu.cn); [yangzj@bjmu.edu.cn](mailto:yangzj@bjmu.edu.cn)

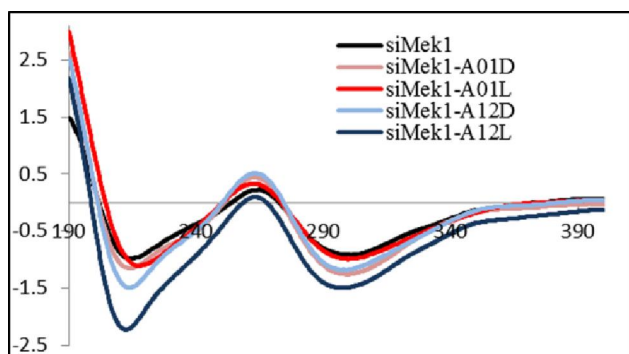

**Figure S1 Circular dichroism spectra of D-/L-IsoNA modified siRNAs**

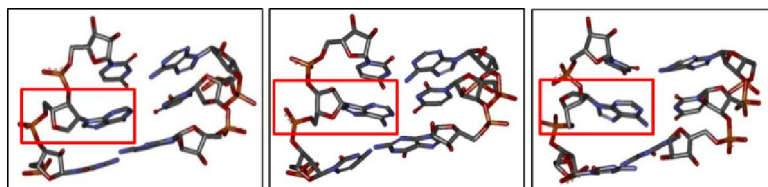

**Figure S2 Predicted regional molecular structures of D-/L-isoNA modified siRNA.** Regional molecular structures of D-/L-isoNA modified siRNA and the unmodified siRNA. **(left)** Regional molecular structure of siMek1-S08D; **(middle)** Regional molecular structure of native siRNA; **(right)** Regional molecular structure of siMek1-S08L.

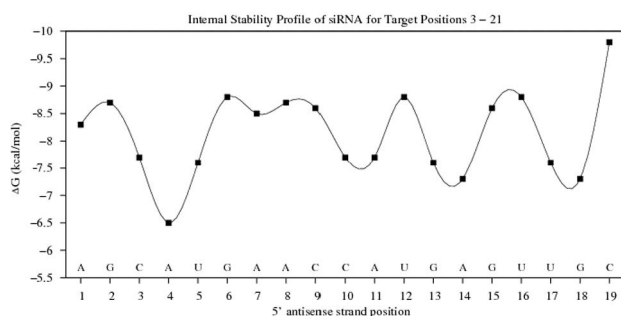

**Figure S3 Sfold calculated internal stability profile**
